# Supplementary material for: Origin of the nano-cracking of dehydrated nesquehonite (MgCO 3 ·3H 2 O)
Source: Royal Society of Chemistry journal article supplement (doi:10.1039/d5cp02981c), 2025-12-12
Supplement: d5cp02981c1.pdf [file d5cp02981c1.pdf]

Supplementary Information

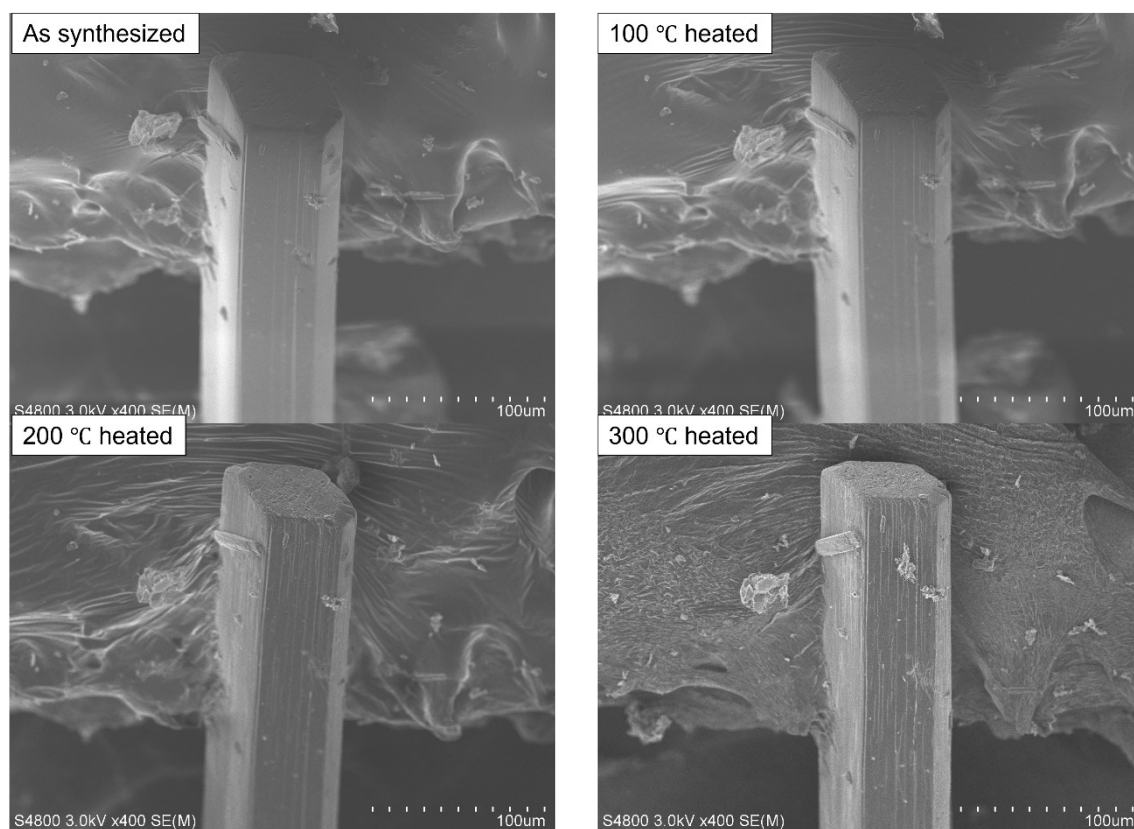

Fig. S1 Crystal shape changes of Nq by heating treatments.

Table S1. Intensity comparison of reflections, 1 0 1, 1 0 3, 0 0 4, 2 0 0, 0 2 1, 3 0 1, and 0 2 5 with their neighboring reflections in *d*-spacing. The listed *d*-spacings were calculated based on the lattice parameters in Table 1, *a* = 5.63, *b* = 5.3312, and *c* = 12.67 Å. Maximum peak heights were the averaged values of corresponding reflections and their equivalent reflections, and their standard deviations ( $\sigma$ ) were also shown.

| Reflection | Calculated d-spacing | Maximum peak height | Note                                                  |
|------------|----------------------|---------------------|-------------------------------------------------------|
| 0 1 0      | 5.331                | 0                   |                                                       |
| 1 0 1      | 5.149                | 1431(450)           |                                                       |
| 0 1 1      | 4.914                | 85(5)               | This reflection is indistinguishable from that of Nq. |
| 1 0 3      | 3.380                | 224(81)             |                                                       |
| 0 1 3      | 3.311                | 13(1)               |                                                       |
| 1 1 2      | 3.304                | 32(2)               |                                                       |
| 0 0 4      | 3.169                | 1012(154)           |                                                       |
| 1 1 3      | 2.855                | 70(6)               |                                                       |
| 2 0 0      | 2.817                | 1169(153)           |                                                       |
| 1 0 4      | 2.762                | 0                   |                                                       |
| 2 0 1      | 2.750                | 0                   |                                                       |
| 0 1 4      | 2.724                | 0                   |                                                       |
| 0 2 0      | 2.666                | 133(1)              | This reflection is indistinguishable from that of Nq. |
| 0 2 1      | 2.609                | 3199(315)           | This reflection is indistinguishable from that of Nq. |
| 2 0 2      | 2.575                | 70(14)              |                                                       |
| 3 0 1      | 1.858                | 203(34)             |                                                       |
| 1 1 6      | 1.854                | 46(8)               | This reflection is indistinguishable from that of Nq. |
| 2 2 2      | 1.852                | 11(1)               |                                                       |
| 0 2 5      | 1.837                | 745(80)             |                                                       |
| 2 1 5      | 1.777                | 41(10)              | This reflection is indistinguishable from that of Nq. |

Table S2. Density of Nq and its dehydrated phases. The standard deviation of a measurement is also shown.

| Heating temperature (°C) | Density (g/cm <sup>3</sup> ) |
|--------------------------|------------------------------|
| As synthesized           | 1.856(1)                     |
| 50                       | 1.855(2)                     |
| 100                      | 2.021(3)                     |
| 150                      | 2.007(3)                     |
| 200                      | 1.876(3)                     |
| 250                      | 1.813(3)                     |
| 300                      | 1.774(3)                     |
| 350                      | 1.814(2)                     |
| 400                      | 2.227(6)                     |
| 450                      | 2.98(2)                      |
| 500                      | 3.32(4)                      |
